# Supplementary material
Source: PubMed Central journal article supplement (PMC9647030)
Supplement: mmc1.pdf [file mmc1.pdf]

**Cell Reports, Volume 41**

**Supplemental information**

**Neutralization of SARS-CoV-2**

**Omicron sublineages by 4 doses**

**of the original mRNA vaccine**

**Xuping Xie, Jing Zou, Chaitanya Kurhade, Mingru Liu, Ping Ren, Pei-Yong Shi**

Table S1. Twenty-five pairs of human serum samples collected after dose 3 and 4 of mRNA vaccine, Related to Figure 1.

| Serum ID | Pair # | Age (year) | Gender (F/M) | Ethnicity | Serum collection time (days post-dose 3 vaccination) | Serum collection time (days post-dose 4 vaccination) | Interval days between dose 3 & 4 vaccination | mRNA Vaccine type                     | *FFRNT <sub>50</sub> |            |            |                 |            |              |               |
|----------|--------|------------|--------------|-----------|------------------------------------------------------|------------------------------------------------------|----------------------------------------------|---------------------------------------|----------------------|------------|------------|-----------------|------------|--------------|---------------|
|          |        |            |              |           |                                                      |                                                      |                                              |                                       | USA-WA1/2020         | BA.1-spike | BA.2-spike | BA.2.12.1-spike | BA.3-spike | BA.4/5-spike | BA.2.75-spike |
| 1        | 1      | 62         | F            | White     | 174                                                  | 37                                                   | 174                                          | Pfizer                                | 17                   | ^10        | 10         | 10              | 10         | 10           | -             |
| 2        |        |            |              |           | 320                                                  |                                                      |                                              |                                       | 40                   | 28         | 20         | 20              | 10         | 40           |               |
| 3        | 2      | 84         | M            | White     | 186                                                  | 26                                                   | 217                                          | Pfizer                                | 17                   | 10         | 10         | 10              | 10         | 10           | -             |
| 4        |        |            |              |           | 640                                                  |                                                      |                                              |                                       | 160                  | 80         | 80         | 80              | 20         | 80           |               |
| 5        | 3      | 80         | M            | Hispanic  | 184                                                  | 30                                                   | 196                                          | Pfizer                                | 34                   | 10         | 10         | 10              | 10         | 10           | -             |
| 6        |        |            |              |           | 10240                                                |                                                      |                                              |                                       | 453                  | 640        | 905        | 320             | 320        | 640          |               |
| 7        | 4      | 78         | M            | White     | 184                                                  | 56                                                   | 209                                          | Pfizer                                | 57                   | 10         | 10         | 10              | 10         | 10           | -             |
| 8        |        |            |              |           | 453                                                  |                                                      |                                              |                                       | 28                   | 20         | 20         | 14              | 10         | 14           |               |
| 9        | 5      | 87         | M            | White     | 243                                                  | 24                                                   | 247                                          | Pfizer                                | 57                   | 10         | 10         | 10              | 10         | 10           | -             |
| 10       |        |            |              |           | 1810                                                 |                                                      |                                              |                                       | 1280                 | 453        | 640        | 453             | 113        | 640          |               |
| 11       | 6      | 66         | F            | White     | 184                                                  | 48                                                   | 241                                          | Pfizer                                | 67                   | 20         | 10         | 10              | 10         | 10           | -             |
| 12       |        |            |              |           | 453                                                  |                                                      |                                              |                                       | 160                  | 80         | 40         | 40              | 20         | 28           |               |
| 13       | 7      | 83         | F            | White     | 148                                                  | 23                                                   | 222                                          | Pfizer                                | 67                   | 10         | 10         | 10              | 10         | 10           | -             |
| 14       |        |            |              |           | 1522                                                 |                                                      |                                              |                                       | 320                  | 320        | 320        | 160             | 160        | 320          |               |
| 15       | 8      | 84         | F            | White     | 174                                                  | 55                                                   | 209                                          | Pfizer                                | 80                   | 10         | 20         | 14              | 10         | 10           | -             |
| 16       |        |            |              |           | 1076                                                 |                                                      |                                              |                                       | 160                  | 226        | 160        | 113             | 80         | 160          |               |
| 17       | 9      | 86         | M            | White     | 189                                                  | 51                                                   | 215                                          | Pfizer                                | 95                   | 40         | 28         | 40              | 20         | 10           | -             |
| 18       |        |            |              |           | 1522                                                 |                                                      |                                              |                                       | 640                  | 320        | 320        | 320             | 20         | 640          |               |
| 19       | 10     | 87         | F            | Hispanic  | 195                                                  | 43                                                   | 259                                          | Pfizer                                | 135                  | 40         | 20         | 40              | 20         | 20           | -             |
| 20       |        |            |              |           | 1076                                                 |                                                      |                                              |                                       | 320                  | 320        | 226        | 160             | 160        | 113          |               |
| 21       | 11     | 67         | F            | Black     | 186                                                  | 50                                                   | 233                                          | Pfizer                                | 135                  | 20         | 10         | 10              | 10         | 10           | -             |
| 22       |        |            |              |           | 1522                                                 |                                                      |                                              |                                       | 160                  | 160        | 226        | 80              | 80         | 160          |               |
| 23       | 12     | 86         | M            | White     | 156                                                  | 49                                                   | 217                                          | Pfizer                                | 135                  | 40         | 40         | 80              | 20         | 40           | -             |
| 24       |        |            |              |           | 1810                                                 |                                                      |                                              |                                       | 640                  | 320        | 320        | 160             | 320        | 320          |               |
| 25       | 13     | 80         | M            | Black     | 184                                                  | 44                                                   | 240                                          | Pfizer                                | 160                  | 10         | 10         | 10              | 10         | 10           | -             |
| 26       |        |            |              |           | 1280                                                 |                                                      |                                              |                                       | 640                  | 320        | 453        | 320             | 160        | 320          |               |
| 27       | 14     | 72         | F            | White     | 191                                                  | 52                                                   | 230                                          | Pfizer                                | 190                  | 20         | 14         | 10              | 10         | 10           | -             |
| 28       |        |            |              |           | 1522                                                 |                                                      |                                              |                                       | 1280                 | 320        | 453        | 320             | 40         | 453          |               |
| 29       | 15     | 75         | F            | White     | 143                                                  | 78                                                   | 209                                          | Pfizer                                | 190                  | 40         | 28         | 28              | 20         | 14           | -             |
| 30       |        |            |              |           | 2560                                                 |                                                      |                                              |                                       | 905                  | 905        | 1280       | 640             | 453        | 640          |               |
| 31       | 16     | 73         | M            | White     | 163                                                  | 94                                                   | 192                                          | Moderna                               | 226                  | 40         | 20         | 80              | 40         | 40           | -             |
| 32       |        |            |              |           | 640                                                  |                                                      |                                              |                                       | 80                   | 57         | 40         | 57              | 40         | 40           |               |
| 33       | 17     | 75         | M            | Black     | 198                                                  | 47                                                   | 207                                          | Pfizer                                | 226                  | 80         | 40         | 40              | 40         | 40           | -             |
| 34       |        |            |              |           | 2153                                                 |                                                      |                                              |                                       | 453                  | 113        | 57         | 80              | 57         | 640          |               |
| 35       | 18     | 80         | M            | White     | 146                                                  | 52                                                   | 205                                          | Pfizer                                | 226                  | 80         | 80         | 20              | 20         | 14           | -             |
| 36       |        |            |              |           | 3620                                                 |                                                      |                                              |                                       | 1280                 | 1280       | 1280       | 640             | 640        | 640          |               |
| 37       | 19     | 78         | M            | White     | 196                                                  | 73                                                   | 214                                          | Pfizer                                | 320                  | 80         | 40         | 40              | 40         | 20           | -             |
| 38       |        |            |              |           | 761                                                  |                                                      |                                              |                                       | 226                  | 80         | 80         | 80              | 40         | 320          |               |
| 39       | 20     | 92         | F            | White     | 163                                                  | 27                                                   | 228                                          | Pfizer                                | 320                  | 113        | 80         | 80              | 40         | 20           | -             |
| 40       |        |            |              |           | 2153                                                 |                                                      |                                              |                                       | 160                  | 160        | 160        | 80              | 113        | 640          |               |
| 41       | 21     | 59         | F            | Hispanic  | 203                                                  | 27                                                   | 254                                          | Pfizer (dose 1-3)<br>Moderna (dose 4) | 381                  | 40         | 20         | 20              | 20         | 10           | -             |
| 42       |        |            |              |           | 1810                                                 |                                                      |                                              |                                       | 640                  | 640        | 1280       | 320             | 160        | 453          |               |

|                |    |    |   |       |     |    |     |                                             |           |         |         |         |         |        |         |
|----------------|----|----|---|-------|-----|----|-----|---------------------------------------------|-----------|---------|---------|---------|---------|--------|---------|
| 43             | 22 | 90 | M | Black | 231 |    | 231 | Pfizer                                      | 453       | 80      | 40      | 40      | 57      | 20     | -       |
| 44             |    |    |   |       |     | 34 |     |                                             |           | 2560    | 453     | 320     | 320     | 320    | 160     |
| 45             | 23 | 94 | F | White | 110 |    | 228 | Pfizer                                      | 453       | 40      | 40      | 40      | 20      | 40     | -       |
| 46             |    |    |   |       |     | 47 |     |                                             |           | 1280    | 320     | 160     | 160     | 80     | 80      |
| 47             | 24 | 71 | F | White | 143 |    | 243 | Moderna<br>(dose 1-3)<br>Pfizer (dose<br>4) | 640       | 226     | 160     | 160     | 160     | 80     | -       |
| 48             |    |    |   |       |     | 27 |     |                                             |           | 2153    | 905     | 640     | 640     | 640    | 320     |
| 49             | 25 | 84 | F | White | 235 |    | 257 | Pfizer                                      | 905       | 160     | 160     | 160     | 80      | 80     | -       |
| 50             |    |    |   |       |     | 35 |     |                                             |           | 20480   | 3620    | 2560    | 2560    | 1280   | 3620    |
| #GMT PD3       | -  | -  | - | -     | -   | -  | -   | -                                           | 144       | 32      | 24      | 25      | 20      | 17     | -       |
| †95% CI<br>PD3 |    |    |   |       |     |    |     |                                             | 93-220    | 22-48   | 17-34   | 17-37   | 14-27   | 13-23  | -       |
| GMT PD4        | -  | -  | - | -     | -   | -  | -   | -                                           | 1554      | 357     | 236     | 236     | 165     | 95     | 263     |
| 95% CI<br>PD4  |    |    |   |       |     |    |     |                                             | 1069-2261 | 224-569 | 147-379 | 136-409 | 101-268 | 56-160 | 157-441 |

\*Individual FFRNT<sub>50</sub> value is the geometric mean of duplicate plaque assay results.

^FFRNT<sub>50</sub> of <20 was treated as 10 for plot purposes and statistical analysis.

#Geometric mean neutralizing titers (GMT).

†95% confidence interval (95% CI) for the GMT.

Table S2. Twenty-nine human serum samples collected after 2 doses of mRNA vaccine and a subsequent Omicron BA.1 breakthrough infection, Related to Figure 2.

| Sample ID | Age (year) | Gender (M/F) | Ethnicity | Vaccine type | COVID test positive days post last vaccine | Serum collection time (Post COVID test positive days) | *FFRNT <sub>50</sub> |            |            |                 |            |              |
|-----------|------------|--------------|-----------|--------------|--------------------------------------------|-------------------------------------------------------|----------------------|------------|------------|-----------------|------------|--------------|
|           |            |              |           |              |                                            |                                                       | USA-WA1/2020         | BA.1-spike | BA.2-spike | BA.2.12.1-spike | BA.3-spike | BA.4/5-spike |
| 1         | 37         | F            | White     | Moderna      | 285                                        | 59                                                    | 320                  | 160        | 80         | 160             | 57         | 20           |
| 2         | 32         | M            | Hispanic  | Pfizer       | 187                                        | 73                                                    | 320                  | 320        | 80         | 160             | 160        | 80           |
| 3         | 20         | M            | Hispanic  | Moderna      | 401                                        | 48                                                    | 640                  | 640        | 320        | 320             | 320        | 160          |
| 4         | 96         | F            | Hispanic  | Pfizer       | 341                                        | 50                                                    | 640                  | 640        | 226        | 320             | 320        | 113          |
| 5         | 87         | M            | White     | Moderna      | 350                                        | 51                                                    | 640                  | 640        | 160        | 226             | 160        | 40           |
| 6         | 36         | F            | White     | Pfizer       | 191                                        | 71                                                    | 640                  | 320        | 160        | 160             | 160        | 80           |
| 7         | 31         | F            | Black     | Pfizer       | 124                                        | 58                                                    | 905                  | 640        | 320        | 320             | 320        | 320          |
| 8         | 51         | F            | White     | Moderna      | 165                                        | 15                                                    | 1280                 | 1280       | 640        | 905             | 640        | 226          |
| 9         | 57         | M            | Asian     | Pfizer       | 392                                        | 30                                                    | 1280                 | 1280       | 320        | 905             | 640        | 160          |
| 10        | 78         | M            | Black     | Moderna      | 152                                        | 34                                                    | 1280                 | 1810       | 905        | 1280            | 1280       | 320          |
| 11        | 64         | F            | Black     | Pfizer       | 232                                        | 35                                                    | 1280                 | 1280       | 640        | 905             | 640        | 320          |
| 12        | 30         | M            | Asian     | Pfizer       | 214                                        | 64                                                    | 1280                 | 905        | 320        | 453             | 320        | 160          |
| 13        | 74         | F            | White     | Pfizer       | 389                                        | 34                                                    | 1810                 | 1280       | 320        | 453             | 320        | 160          |
| 14        | 21         | F            | Hispanic  | Moderna      | 254                                        | 49                                                    | 1810                 | 2560       | 1280       | 1280            | 1280       | 226          |
| 15        | 31         | F            | White     | Pfizer       | 317                                        | 105                                                   | 1810                 | 1280       | 640        | 640             | 640        | 320          |
| 16        | 62         | M            | White     | Pfizer       | 316                                        | 29                                                    | 2560                 | 1810       | 640        | 640             | 1280       | 320          |
| 17        | 38         | F            | Asian     | Pfizer       | 98                                         | 33                                                    | 2560                 | 2560       | 1280       | 1280            | 1280       | 320          |
| 18        | 30         | F            | Hispanic  | Pfizer       | 126                                        | 43                                                    | 2560                 | 2560       | 1280       | 1280            | 1280       | 453          |
| 19        | 33         | F            | Asian     | Moderna      | 326                                        | 48                                                    | 2560                 | 2560       | 1280       | 1810            | 1280       | 320          |
| 20        | 28         | M            | Hispanic  | Pfizer       | 159                                        | 60                                                    | 3620                 | 640        | 640        | 640             | 320        | 160          |
| 21        | 74         | M            | White     | Pfizer       | 313                                        | 118                                                   | 3620                 | 1280       | 640        | 640             | 640        | 160          |
| 22        | 66         | M            | White     | Pfizer       | 156                                        | 16                                                    | 5120                 | 3620       | 1280       | 2560            | 1280       | 640          |
| 23        | 59         | M            | White     | Pfizer       | 239                                        | 18                                                    | 5120                 | 7241       | 2560       | 5120            | 5120       | 2560         |
| 24        | 18         | F            | Hispanic  | Pfizer       | 309                                        | 18                                                    | 5120                 | 5120       | 1280       | 2560            | 1810       | 640          |
| 25        | 35         | M            | White     | Moderna      | 303                                        | 63                                                    | 5120                 | 5120       | 2560       | 1280            | 2560       | 320          |
| 26        | 63         | F            | Hispanic  | Pfizer       | 279                                        | 36                                                    | 7241                 | 5120       | 2560       | 2560            | 2560       | 1280         |
| 27        | 51         | M            | Asian     | Pfizer       | 391                                        | 28                                                    | 10240                | 10240      | 5120       | 10240           | 5120       | 1810         |
| 28        | 71         | F            | White     | Pfizer       | 346                                        | 39                                                    | 14482                | 7241       | 3620       | 5120            | 5120       | 640          |
| 29        | 46         | F            | Hispanic  | Pfizer       | 266                                        | 29                                                    | 20480                | 20480      | 10240      | 14482           | 10240      | 1280         |
| #GMT      | -          | -            | -         | -            | -                                          | -                                                     | 2114                 | 1705       | 730        | 961             | 813        | 274          |
| †95% CI   | -          | -            | -         | -            | -                                          | -                                                     | 1411-3167            | 1112-2614  | 465-1145   | 612-1509        | 511-1294   | 182-412      |

\*Individual FFRNT<sub>50</sub> value is the geometric mean of duplicate plaque assay results.

#Geometric mean neutralizing titers (GMT).

†95% confidence interval (95% CI) for the GMT.

Table S3. Thirty-eight human serum samples collected after 3 doses of mRNA vaccine and a subsequent Omicron BA.1 breakthrough infection, Related to Figure 2.

| Sample ID | Age (year) | Gender (M/F) | Ethnicity | Vaccine type                         | COVID test positive days post last vaccine | Serum collection time (Post COVID test positive days) | FFRNT <sub>50</sub> |            |            |                 |            |              |               |
|-----------|------------|--------------|-----------|--------------------------------------|--------------------------------------------|-------------------------------------------------------|---------------------|------------|------------|-----------------|------------|--------------|---------------|
|           |            |              |           |                                      |                                            |                                                       | USA-WA1/2020        | BA.1-spike | BA.2-spike | BA.2.12.1-spike | BA.3-spike | BA.4/5-spike | BA.2.75-spike |
| 1         | 36         | M            | Hispanic  | Pfizer                               | 142                                        | 91                                                    | 453                 | 226        | 160        | 160             | 160        | 40           | 160           |
| 2         | 36         | M            | Hispanic  | Pfizer                               | 142                                        | 61                                                    | 640                 | 453        | 160        | 320             | 320        | 40           | 160           |
| 3         | 64         | M            | White     | Pfizer                               | 40                                         | 75                                                    | 640                 | 160        | 160        | 160             | 113        | 80           | 80            |
| 4         | 62         | F            | White     | Pfizer                               | 130                                        | 81                                                    | 640                 | 453        | 320        | 320             | 320        | 160          | 160           |
| 5         | 27         | M            | White     | Moderna                              | 111                                        | 134                                                   | 640                 | 320        | 160        | 320             | 226        | 80           | 160           |
| 6         | 34         | F            | Black     | Pfizer                               | 85                                         | 40                                                    | 1280                | 1280       | 640        | 640             | 640        | 320          | 640           |
| 7         | 60         | F            | Hispanic  | Pfizer                               | 39                                         | 76                                                    | 1280                | 640        | 320        | 320             | 320        | 80           | 453           |
| 8         | 29         | F            | White     | Pfizer                               | 15                                         | 91                                                    | 1280                | 453        | 320        | 320             | 320        | 80           | 320           |
| 9         | 58         | M            | Asian     | Pfizer                               | 30                                         | 113                                                   | 1280                | 1280       | 640        | 1280            | 640        | 453          | 640           |
| 10        | 39         | F            | Asian     | Pfizer                               | 110                                        | 23                                                    | 2560                | 2560       | 1280       | 1280            | 1280       | 320          | 1280          |
| 11        | 72         | M            | White     | Pfizer                               | 28                                         | 32                                                    | 2560                | 2560       | 1280       | 1810            | 1280       | 226          | 2560          |
| 12        | 43         | F            | Asian     | Pfizer                               | 89                                         | 58                                                    | 2560                | 2560       | 2560       | 1810            | 1280       | 905          | 2560          |
| 13        | 45         | F            | Hispanic  | Pfizer                               | 141                                        | 46                                                    | 2560                | 5120       | 1810       | 2560            | 2560       | 640          | 1810          |
| 14        | 51         | F            | Black     | Pfizer                               | 44                                         | 35                                                    | 2560                | 2560       | 905        | 640             | 1280       | 320          | 1280          |
| 15        | 56         | F            | Black     | Pfizer                               | 98                                         | 93                                                    | 2560                | 2560       | 640        | 1280            | 1280       | 226          | 1280          |
| 16        | 67         | F            | White     | Pfizer                               | 71                                         | 63                                                    | 2560                | 1280       | 640        | 640             | 640        | 160          | 640           |
| 17        | 64         | M            | White     | Pfizer                               | 114                                        | 33                                                    | 2560                | 2560       | 1280       | 1280            | 1280       | 320          | 905           |
| 18        | 28         | F            | White     | Pfizer                               | 158                                        | 61                                                    | 2560                | 2560       | 1280       | 1280            | 1280       | 320          | 1810          |
| 19        | 64         | M            | Asian     | Pfizer                               | 117                                        | 73                                                    | 2560                | 2560       | 1280       | 1280            | 1280       | 160          | 2560          |
| 20        | 63         | F            | White     | Pfizer                               | 174                                        | 22                                                    | 2560                | 2560       | 1280       | 2560            | 905        | 1280         | 1280          |
| 21        | 41         | F            | Hispanic  | Moderna (dose 1-2) & Pfizer (dose 3) | 84                                         | 64                                                    | 2560                | 1280       | 320        | 453             | 453        | 160          | 640           |
| 22        | 64         | F            | Asian     | Pfizer                               | 118                                        | 105                                                   | 3620                | 2560       | 1280       | 1280            | 1280       | 320          | 2560          |
| 23        | 54         | M            | White     | Pfizer                               | 93                                         | 34                                                    | 5120                | 2560       | 2560       | 2560            | 1810       | 640          | 2560          |
| 24        | 26         | F            | White     | Moderna                              | 63                                         | 51                                                    | 5120                | 5120       | 1810       | 2560            | 2560       | 1280         | 2560          |
| 25        | 44         | F            | Hispanic  | Pfizer                               | 43                                         | 15                                                    | 5120                | 2560       | 1280       | 1280            | 1280       | 640          | 1810          |
| 26        | 77         | M            | Hispanic  | Pfizer                               | 130                                        | 64                                                    | 5120                | 5120       | 2560       | 2560            | 2560       | 1280         | 2560          |
| 27        | 69         | M            | White     | Pfizer                               | 124                                        | 79                                                    | 5120                | 2560       | 1280       | 1810            | 1280       | 320          | 1280          |
| 28        | 73         | F            | White     | Moderna                              | 164                                        | 36                                                    | 5120                | 3620       | 2560       | 1810            | 1280       | 226          | 640           |
| 29        | 84         | F            | Hispanic  | Pfizer                               | 99                                         | 46                                                    | 5120                | 5120       | 1280       | 2560            | 1280       | 226          | 2560          |
| 30        | 61         | F            | White     | Pfizer                               | 169                                        | 40                                                    | 5120                | 2560       | 640        | 1280            | 905        | 226          | 1280          |
| 31        | 58         | M            | Hispanic  | Moderna                              | 77                                         | 73                                                    | 5120                | 1810       | 640        | 905             | 1280       | 320          | 1280          |
| 32        | 75         | M            | White     | Pfizer                               | 131                                        | 108                                                   | 5120                | 2560       | 1280       | 1280            | 1280       | 320          | 1280          |
| 33        | 79         | F            | White     | Pfizer                               | 144                                        | 17                                                    | 5120                | 2560       | 640        | 1280            | 905        | 640          | 1280          |
| 34        | 38         | M            | White     | Pfizer                               | 109                                        | 49                                                    | 10240               | 5120       | 5120       | 5120            | 2560       | 1280         | 2560          |
| 35        | 71         | M            | White     | Pfizer                               | 129                                        | 54                                                    | 10240               | 7241       | 2560       | 2560            | 2560       | 80           | 5120          |
| 36        | 39         | F            | Hispanic  | Pfizer                               | 118                                        | 126                                                   | 10240               | 5120       | 2560       | 3620            | 2560       | 640          | 2560          |
| 37        | 68         | M            | White     | Pfizer                               | 125                                        | 71                                                    | 10240               | 5120       | 2560       | 2560            | 2560       | 640          | 80            |
| 38        | 66         | M            | White     | Pfizer                               | 96                                         | 41                                                    | 20480               | 20480      | 10240      | 14482           | 10240      | 1810         | 10240         |
| #GMT      | -          | -            | -         | -                                    | -                                          | -                                                     | 2962                | 2038       | 983        | 1190            | 1019       | 297          | 1019          |
| †95% CI   | -          | -            | -         | -                                    | -                                          | -                                                     | 2212-3967           | 1462-2841  | 712-1357   | 869-1630        | 759-1367   | 216-410      | 702-1480      |

\*Individual FFRNT<sub>50</sub> value is the geometric mean of duplicate plaque assay results.

#Geometric mean neutralizing titers (GMT).

†95% confidence interval (95% CI) for the GMT.
